# Supplementary material for: Age- and gender-specific characteristics of the resting-state brain activity: a magnetoencephalography study
Source: publisher site journal article supplement (doi:10.18632/aging.103956), 2020-11-04
Supplement: Supplementary file [file aging-v12i21-103956-supplementary-material-SD2.pdf]

## SUPPLEMENTARY FIGURES

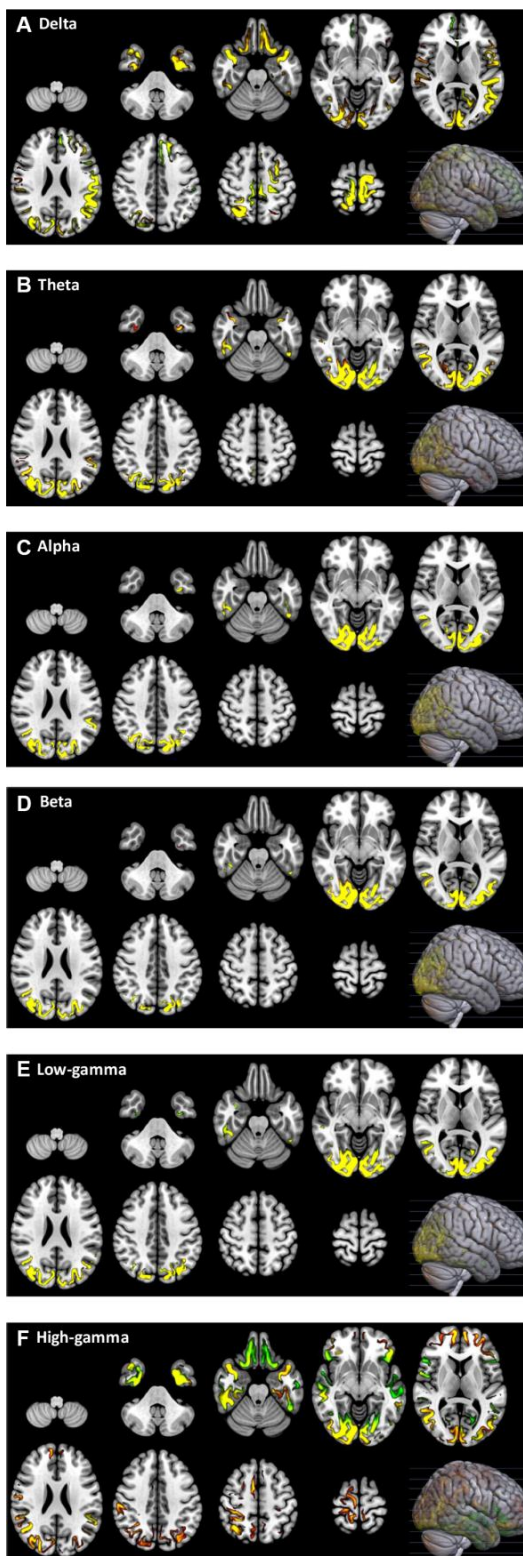

**Supplementary Figure 1. Before and after artefact cleaning for data #0005.** For each frequency band, the source images generated from original (red) and artefact-cleaned (green) procedures are rendered on the template anatomical brain. In the yellow-colored regions, the source signals of the original and artefact-cleaned results are overlapped. The locations of axial slices are indicated by horizontal lines of 3D brain in the right lower position of each panel.

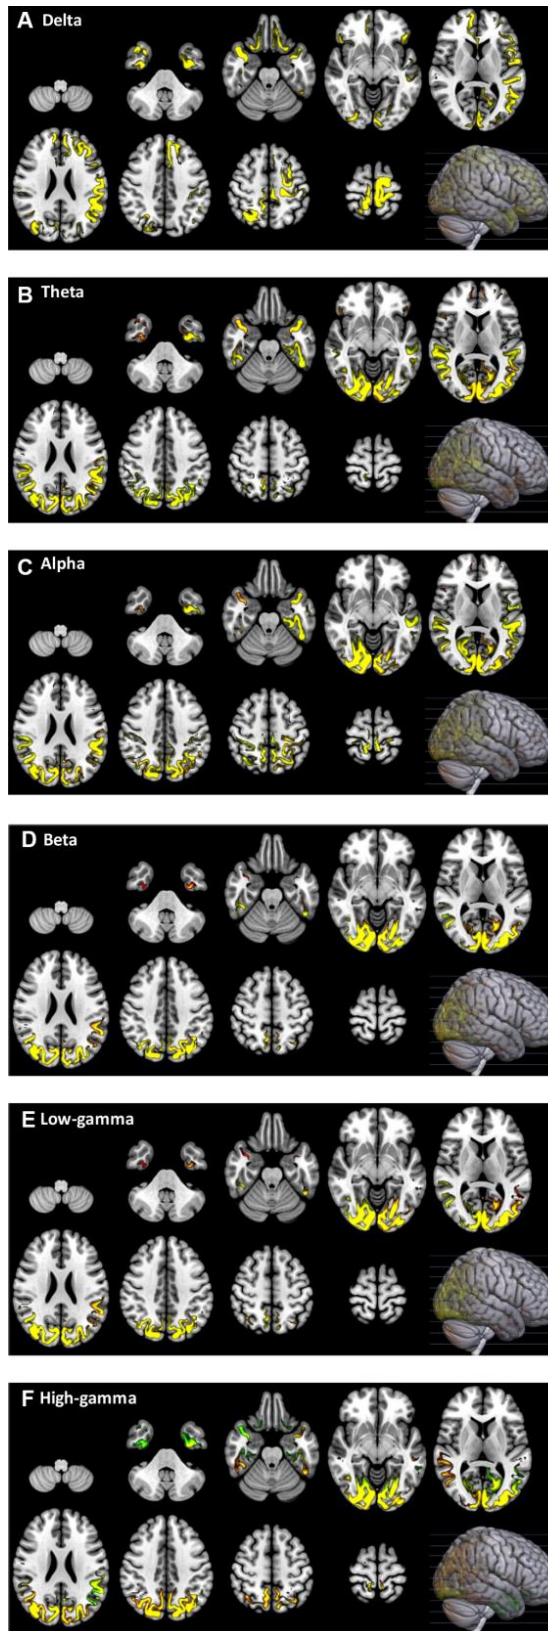

**Supplementary Figure 2. Before and after artefact cleaning for data #0007.** For each frequency band, the source images generated from original (red) and artefact-cleaned (green) procedures are rendered on the template anatomical brain. In the yellow-colored regions, the source signals of the original and artefact-cleaned results are overlapped. The locations of axial slices are indicated by horizontal lines of 3D brain in the right lower position of each panel.

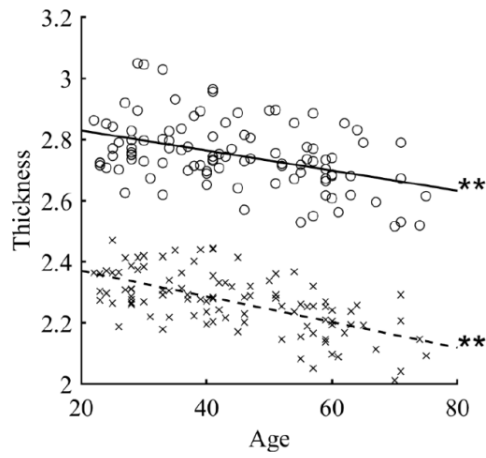

**Supplementary Figure 3. Relationships between age and cortical thickness.** Circle markers and solid line represent the data for the rostral region, and cross markers and dotted line represent the data for the caudal region.
